# Supplementary material
Source: Royal Society of Chemistry journal article supplement (doi:10.1039/d6an00232c)
Supplement: d6an00232c1.pdf [file d6an00232c1.pdf]

## Supporting information

# Data-Driven Optimization for Controllable Multi-Scale Aperture Fabrication of Nanopipettes

Runan Guo<sup>a</sup>, Zhi Chen<sup>a</sup>, Xue Han<sup>a,e</sup>, Rongke Sun<sup>a</sup>, Hui Lu<sup>a,e</sup>, Yanqing Ma<sup>a,b,c,d\*</sup>

and Lei Ma<sup>a,b,c\*</sup>

<sup>a</sup> Tianjin International Center for Nanoparticles and Nanosystems, Tianjin University, 300072, P. R. China. Tianjin University, 300072, P. R. China

<sup>b</sup> Tianjin Key Laboratory for Low-dimensional Electronic Materials and Advanced Instrumentation, Tianjin University, 300072, P.R. China.

<sup>c</sup> Haihe Laboratory for Low-dimensional Electronic Materials, Add 1 to No. 57, Wujiayao Street, Hexi District, Tianjin, 30074, P.R. China.

<sup>d</sup> School of Precision Instrument and Opto-electronics Engineering, Tianjin University, Tianjin 300072, P.R. China

<sup>e</sup> School of Chemistry and Chemical Engineering, Shihezi University, 832003, P.R. China

Corresponding author:

Yanqing Ma, [mayanqing@tju.edu.cn](mailto:mayanqing@tju.edu.cn), Lei Ma, [lei.ma@tju.edu.cn](mailto:lei.ma@tju.edu.cn)

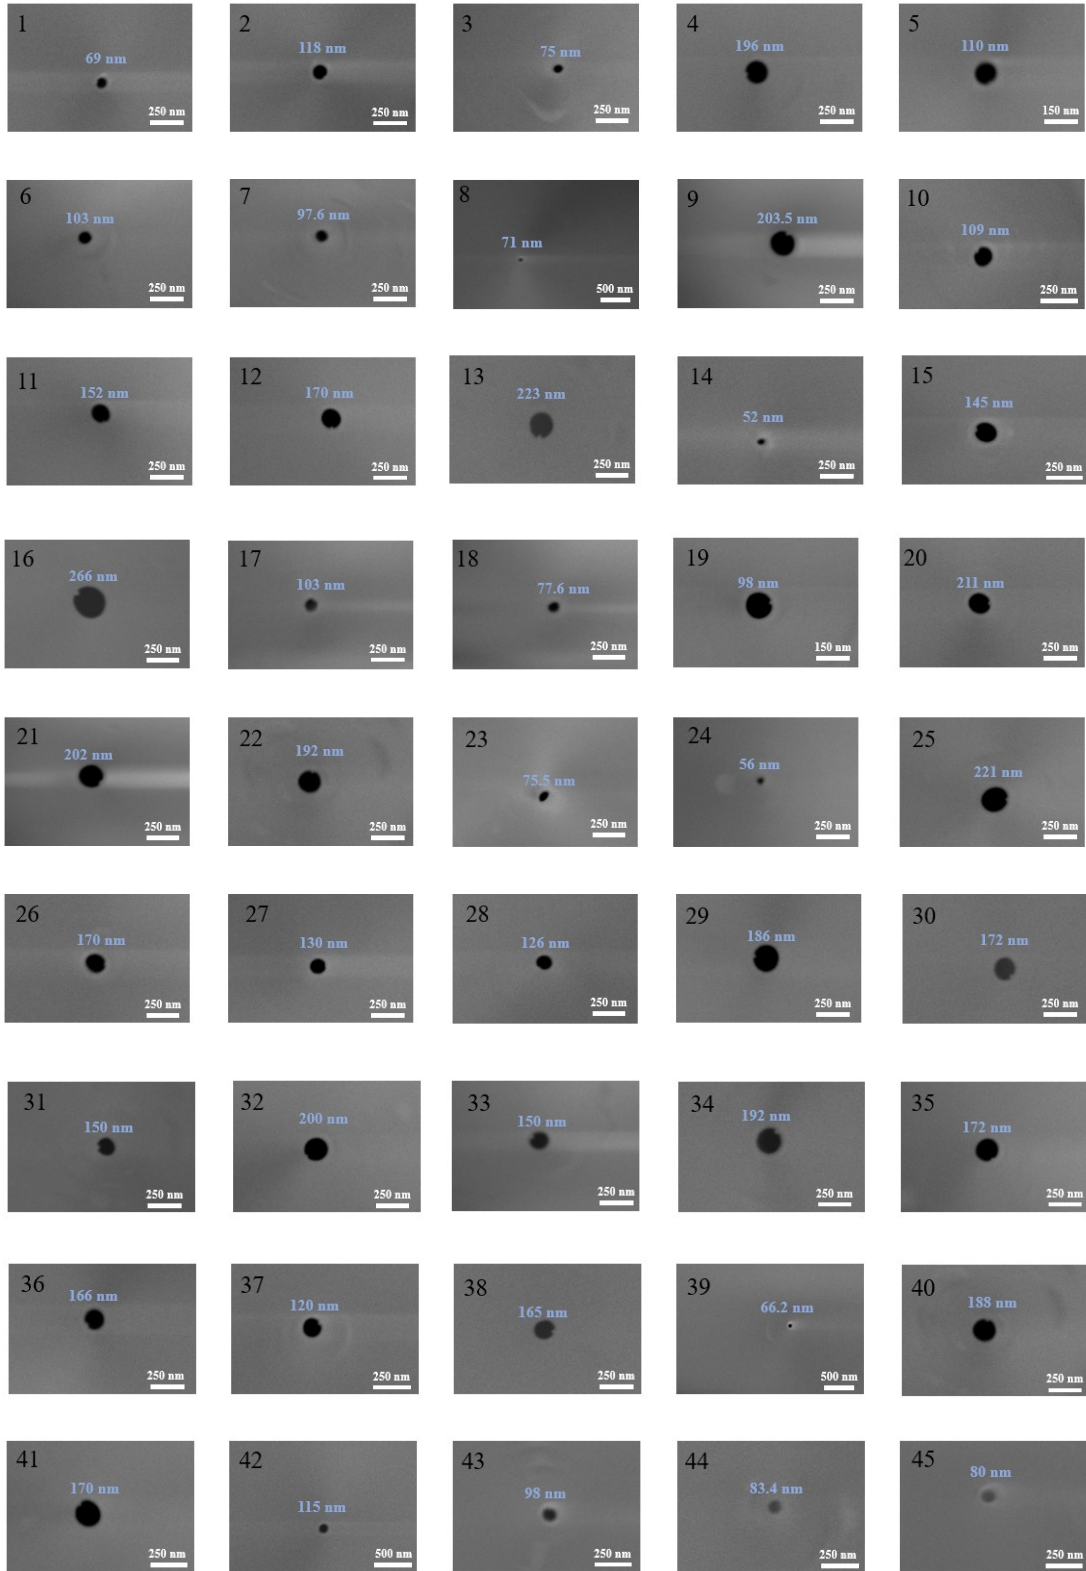

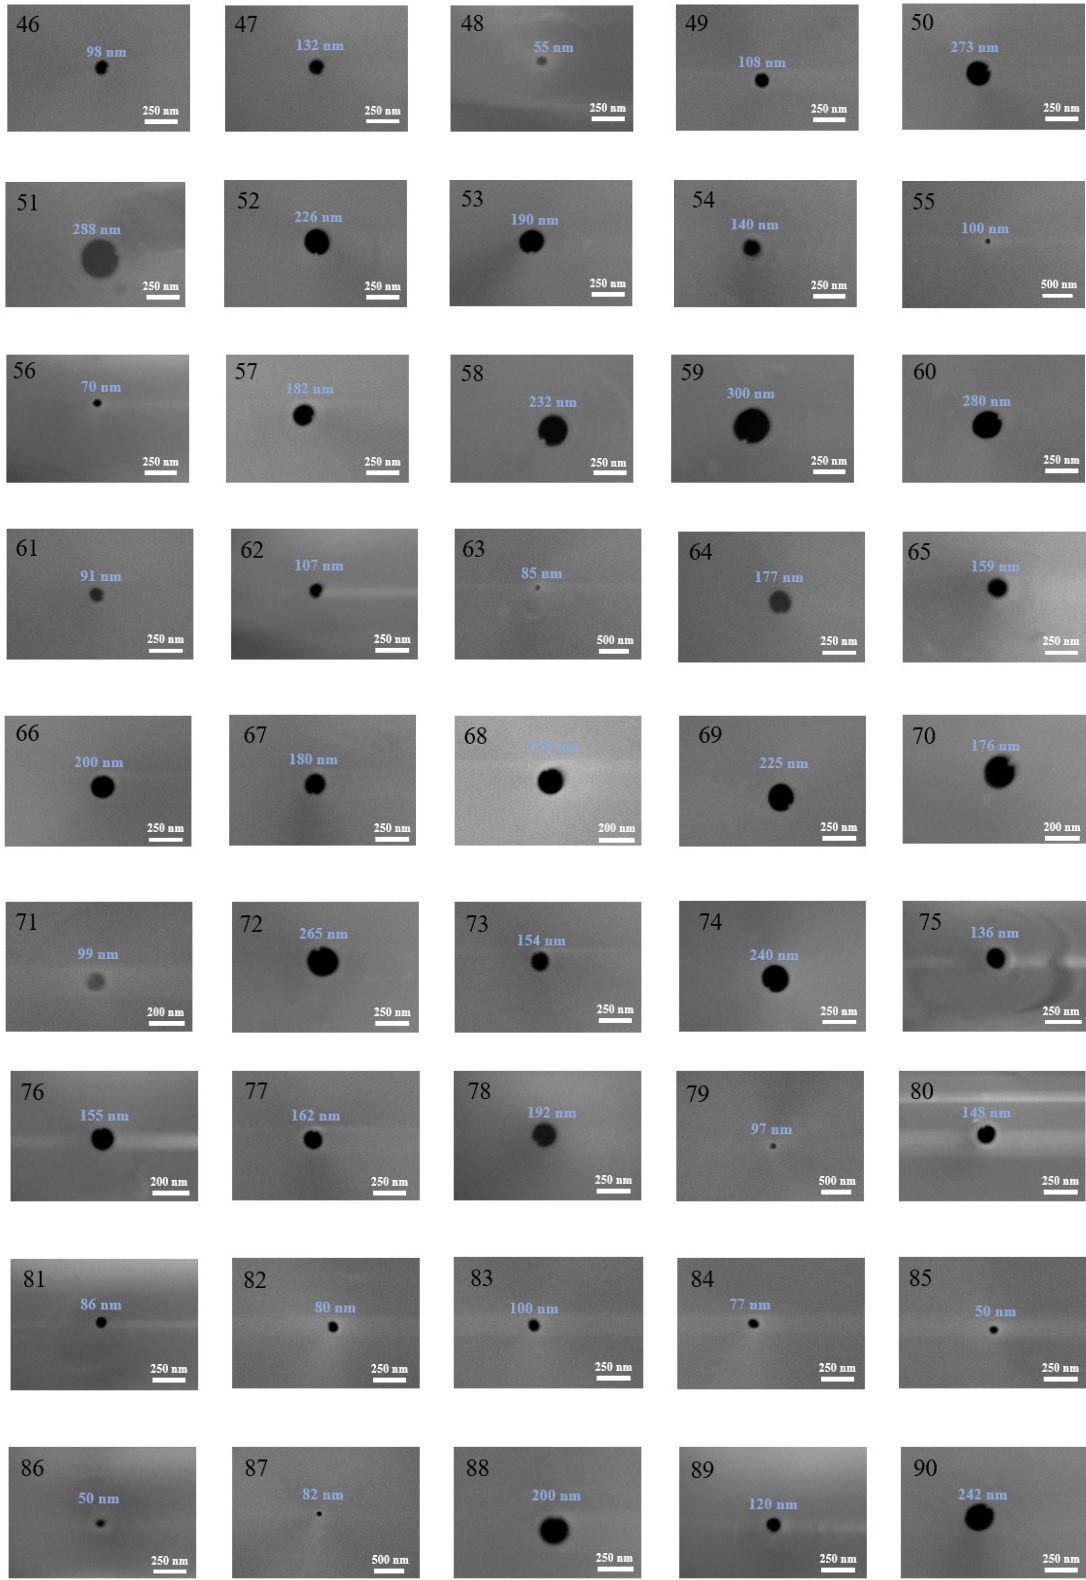

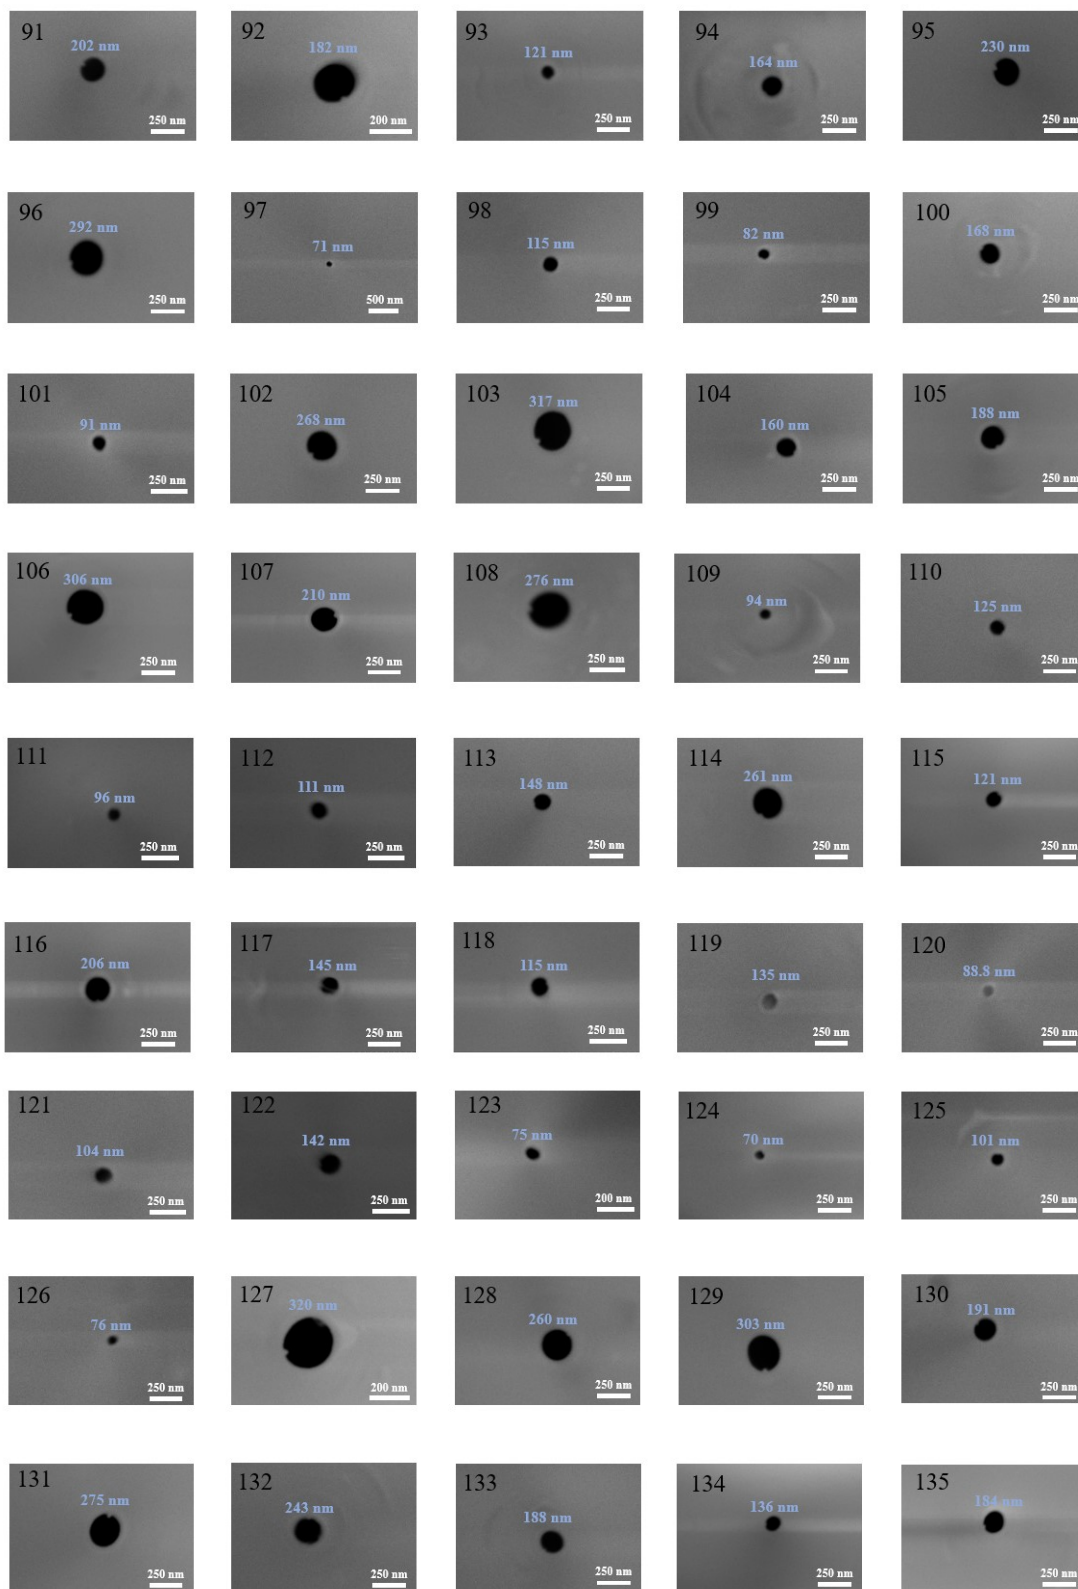

Figure S1 SEM morphology images (cross-section) of the 135 Nanopipettes samples used for training the ANN model. The numbers in each figure correspond to the serial numbers in Table S1.

Table S1 the 135 sets of Nanopipettes parameters for training the ANN model.

|    | HEAT | Fil | Vel | Del | Pull | Diameter |
|----|------|-----|-----|-----|------|----------|
| 1  | 320  | 3   | 35  | 230 | 140  | 69       |
| 2  | 300  | 3   | 40  | 240 | 130  | 118      |
| 3  | 300  | 3   | 40  | 220 | 150  | 75       |
| 4  | 300  | 3   | 30  | 220 | 130  | 196      |
| 5  | 300  | 3   | 30  | 220 | 150  | 110      |
| 6  | 300  | 3   | 30  | 240 | 150  | 103      |
| 7  | 300  | 3   | 40  | 220 | 130  | 97.6     |
| 8  | 300  | 3   | 40  | 240 | 150  | 71       |
| 9  | 300  | 3   | 30  | 240 | 135  | 203.5    |
| 10 | 280  | 3   | 35  | 250 | 140  | 109      |
| 11 | 280  | 3   | 35  | 230 | 120  | 152      |
| 12 | 280  | 3   | 29  | 230 | 140  | 170      |
| 13 | 300  | 3   | 30  | 240 | 130  | 223      |
| 14 | 280  | 3   | 45  | 230 | 140  | 52       |
| 15 | 270  | 3   | 35  | 235 | 135  | 145      |
| 16 | 260  | 3   | 33  | 240 | 135  | 266      |
| 17 | 280  | 3   | 35  | 210 | 140  | 103      |
| 18 | 280  | 3   | 35  | 230 | 160  | 77.6     |
| 19 | 280  | 3   | 35  | 230 | 140  | 98       |
| 20 | 260  | 3   | 35  | 230 | 130  | 211      |
| 21 | 260  | 3   | 30  | 240 | 135  | 202      |
| 22 | 260  | 3   | 30  | 240 | 150  | 192      |
| 23 | 260  | 3   | 40  | 220 | 130  | 75.5     |
| 24 | 260  | 3   | 40  | 220 | 150  | 56       |
| 25 | 260  | 3   | 30  | 220 | 135  | 221      |
| 26 | 260  | 3   | 40  | 240 | 130  | 170      |
| 27 | 260  | 3   | 30  | 220 | 150  | 130      |
| 28 | 260  | 3   | 40  | 240 | 150  | 126      |
| 29 | 250  | 3   | 35  | 230 | 135  | 186      |
| 30 | 260  | 3   | 38  | 240 | 135  | 172      |
| 31 | 260  | 3   | 40  | 240 | 135  | 150      |
| 32 | 250  | 3   | 35  | 235 | 135  | 200      |
| 33 | 290  | 3   | 35  | 235 | 110  | 150      |
| 34 | 255  | 3   | 35  | 235 | 120  | 192      |
| 35 | 255  | 3   | 35  | 235 | 130  | 172      |
| 36 | 260  | 3   | 35  | 235 | 130  | 166      |
| 37 | 290  | 3   | 35  | 235 | 130  | 120      |
| 38 | 250  | 3   | 35  | 220 | 135  | 165      |
| 39 | 300  | 4   | 38  | 220 | 150  | 66.2     |
| 40 | 255  | 3   | 35  | 235 | 135  | 188      |
| 41 | 260  | 3   | 35  | 235 | 135  | 170      |
| 42 | 280  | 3   | 35  | 235 | 135  | 115      |

Table S1 (Continued)

---

|    |     |   |    |     |     |      |
|----|-----|---|----|-----|-----|------|
| 43 | 290 | 3 | 35 | 235 | 135 | 98   |
| 44 | 320 | 3 | 35 | 235 | 135 | 83.4 |
| 45 | 310 | 3 | 35 | 235 | 135 | 80   |
| 46 | 300 | 3 | 35 | 235 | 135 | 98   |
| 47 | 255 | 3 | 35 | 235 | 150 | 132  |
| 48 | 320 | 3 | 35 | 235 | 150 | 55   |
| 49 | 255 | 3 | 35 | 235 | 160 | 108  |
| 50 | 230 | 1 | 38 | 240 | 120 | 273  |
| 51 | 240 | 3 | 35 | 240 | 130 | 288  |
| 52 | 250 | 3 | 35 | 240 | 130 | 226  |
| 53 | 260 | 3 | 35 | 240 | 130 | 190  |
| 54 | 280 | 3 | 35 | 240 | 130 | 140  |
| 55 | 300 | 3 | 35 | 240 | 130 | 100  |
| 56 | 310 | 3 | 35 | 240 | 130 | 70   |
| 57 | 260 | 3 | 35 | 240 | 135 | 182  |
| 58 | 250 | 3 | 35 | 240 | 135 | 232  |
| 59 | 240 | 3 | 35 | 240 | 135 | 300  |
| 60 | 245 | 3 | 35 | 240 | 135 | 280  |
| 61 | 270 | 3 | 35 | 240 | 140 | 91   |
| 62 | 280 | 3 | 35 | 240 | 140 | 107  |
| 63 | 300 | 3 | 35 | 240 | 140 | 85   |
| 64 | 250 | 3 | 35 | 240 | 140 | 177  |
| 65 | 260 | 3 | 35 | 240 | 140 | 159  |
| 66 | 240 | 3 | 35 | 240 | 140 | 200  |
| 67 | 265 | 3 | 35 | 245 | 130 | 180  |
| 68 | 280 | 3 | 35 | 245 | 130 | 150  |
| 69 | 250 | 3 | 35 | 245 | 135 | 225  |
| 70 | 270 | 3 | 35 | 245 | 135 | 176  |
| 71 | 300 | 3 | 35 | 245 | 140 | 99   |
| 72 | 250 | 3 | 35 | 250 | 135 | 265  |
| 73 | 280 | 3 | 35 | 250 | 135 | 154  |
| 74 | 240 | 3 | 35 | 230 | 140 | 240  |
| 75 | 300 | 4 | 35 | 220 | 135 | 136  |
| 76 | 280 | 4 | 35 | 220 | 135 | 155  |
| 77 | 320 | 4 | 35 | 235 | 130 | 162  |
| 78 | 290 | 4 | 35 | 235 | 140 | 192  |
| 79 | 300 | 4 | 35 | 235 | 140 | 97   |
| 80 | 270 | 4 | 35 | 235 | 150 | 148  |
| 81 | 280 | 4 | 35 | 235 | 150 | 86   |
| 82 | 290 | 4 | 35 | 235 | 150 | 80   |
| 83 | 300 | 4 | 35 | 235 | 150 | 100  |
| 84 | 310 | 4 | 35 | 235 | 150 | 77   |
| 85 | 320 | 4 | 35 | 235 | 150 | 50   |

---

Table S1 (Continued)

---

|     |     |   |    |     |     |      |
|-----|-----|---|----|-----|-----|------|
| 86  | 325 | 4 | 35 | 235 | 150 | 50   |
| 87  | 290 | 4 | 35 | 240 | 150 | 82   |
| 88  | 300 | 4 | 35 | 250 | 150 | 200  |
| 89  | 320 | 4 | 35 | 250 | 150 | 120  |
| 90  | 240 | 2 | 35 | 235 | 135 | 242  |
| 91  | 245 | 2 | 35 | 235 | 135 | 202  |
| 92  | 255 | 2 | 35 | 235 | 135 | 182  |
| 93  | 270 | 2 | 35 | 235 | 135 | 121  |
| 94  | 270 | 3 | 35 | 240 | 120 | 164  |
| 95  | 245 | 2 | 35 | 240 | 130 | 230  |
| 96  | 240 | 2 | 35 | 240 | 135 | 292  |
| 97  | 310 | 2 | 35 | 230 | 140 | 71   |
| 98  | 270 | 2 | 35 | 230 | 140 | 115  |
| 99  | 270 | 2 | 35 | 240 | 150 | 82   |
| 100 | 270 | 2 | 35 | 245 | 130 | 168  |
| 101 | 300 | 2 | 35 | 245 | 130 | 91   |
| 102 | 250 | 2 | 35 | 245 | 130 | 268  |
| 103 | 240 | 2 | 35 | 245 | 130 | 317  |
| 104 | 250 | 2 | 35 | 240 | 150 | 160  |
| 105 | 270 | 2 | 35 | 240 | 120 | 188  |
| 106 | 230 | 2 | 35 | 240 | 150 | 306  |
| 107 | 250 | 2 | 35 | 240 | 135 | 210  |
| 108 | 240 | 2 | 35 | 242 | 135 | 276  |
| 109 | 300 | 1 | 35 | 240 | 135 | 94   |
| 110 | 270 | 1 | 35 | 240 | 135 | 125  |
| 111 | 260 | 2 | 38 | 220 | 130 | 96   |
| 112 | 300 | 2 | 32 | 240 | 150 | 111  |
| 113 | 270 | 2 | 35 | 230 | 120 | 148  |
| 114 | 250 | 2 | 32 | 240 | 130 | 261  |
| 115 | 260 | 2 | 32 | 220 | 150 | 121  |
| 116 | 260 | 2 | 32 | 220 | 130 | 206  |
| 117 | 260 | 2 | 32 | 240 | 150 | 145  |
| 118 | 260 | 2 | 38 | 240 | 140 | 115  |
| 119 | 260 | 2 | 38 | 240 | 130 | 135  |
| 120 | 260 | 2 | 38 | 240 | 150 | 88.8 |
| 121 | 300 | 2 | 32 | 220 | 130 | 104  |
| 122 | 300 | 2 | 32 | 240 | 130 | 142  |
| 123 | 300 | 2 | 38 | 220 | 130 | 75   |
| 124 | 300 | 2 | 38 | 220 | 150 | 70   |
| 125 | 300 | 2 | 38 | 240 | 130 | 101  |
| 126 | 300 | 2 | 38 | 240 | 150 | 76   |
| 127 | 230 | 1 | 35 | 240 | 135 | 320  |
| 128 | 230 | 1 | 35 | 240 | 150 | 260  |

---

Table S1 (Continued)

|     |     |   |    |     |     |     |
|-----|-----|---|----|-----|-----|-----|
| 129 | 235 | 1 | 35 | 240 | 135 | 303 |
| 130 | 240 | 1 | 35 | 230 | 130 | 191 |
| 131 | 240 | 1 | 35 | 240 | 135 | 275 |
| 132 | 250 | 1 | 35 | 240 | 120 | 243 |
| 133 | 250 | 1 | 35 | 240 | 135 | 188 |
| 134 | 250 | 1 | 35 | 240 | 150 | 136 |
| 135 | 250 | 1 | 40 | 240 | 120 | 184 |

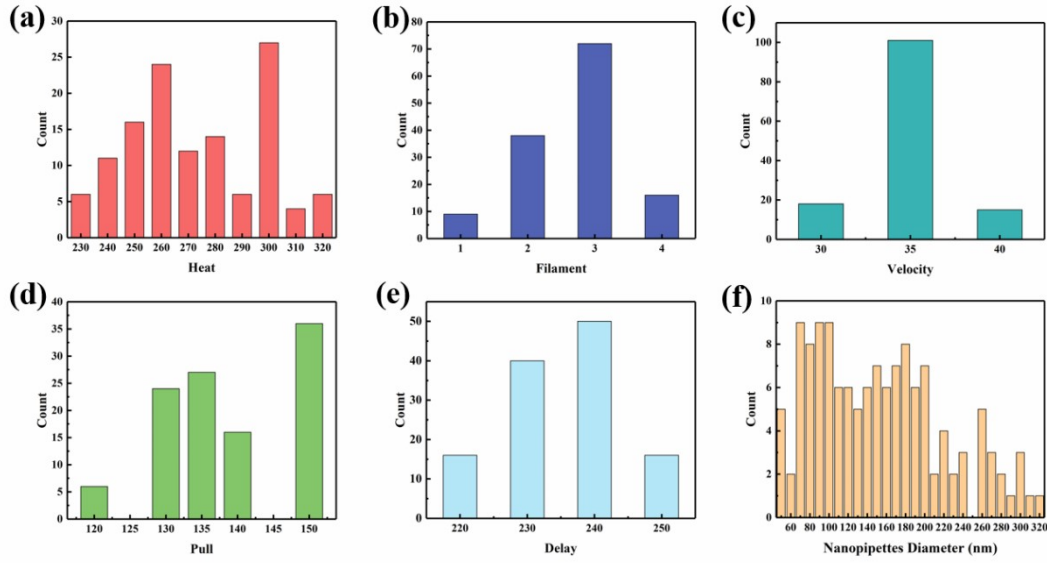

Figure S2 Frequency distributions of the key fabrication parameters and resulting nanopipette diameters. (a) Heat; (b) Filament; (c) Velocity; (d) Pull; (e) Delay; (f) Nanopipette diameter (nm).

As shown in Figure S2, it should be noted that the fabrication parameters appear to be concentrated in the middle regions, with fewer data points near the parameter boundaries. This is not due to an uneven experimental design, but arises from the instability of the pulling process near the parameter limits: when parameters approach the edges of the feasible range, the nanopipette aperture often exhibits an abrupt change (similar to Point 4 in Figure 4b), yielding invalid or unusable samples. These unstable and meaningless data were excluded during preprocessing, leaving only valid and reproducible data within the reliable parameter range. Notably, even though the fabrication parameters are concentrated in the middle range, the corresponding nanopipette aperture values are evenly distributed across the target range of 50–1000 nm, which ensures that the dataset is representative and sufficient for model training and prediction within the practical application scope.

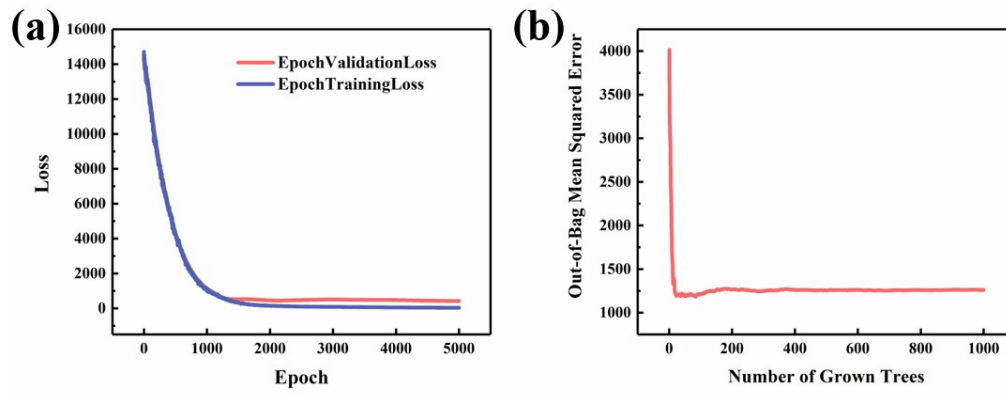

Figure S3 (a) Convergence curves of training and validation loss for the ANN over 5000 iterations; (b) Evolution of the out-of-bag mean squared error (OOB-MSE) as a function of the number of decision trees in the random forest model.

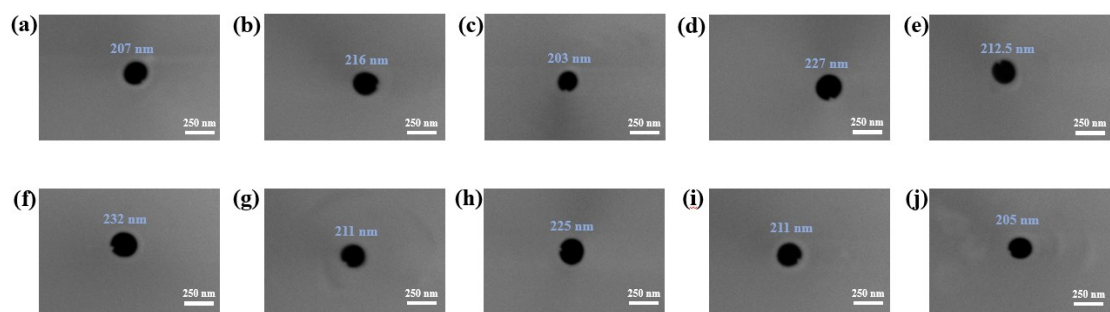

Figure S4 (a-j) SEM cross-sectional images of ten nanopipette tips fabricated under the same parameter set (Heat 250, Filament 3, Velocity 35, Delay 235, Pull 135).

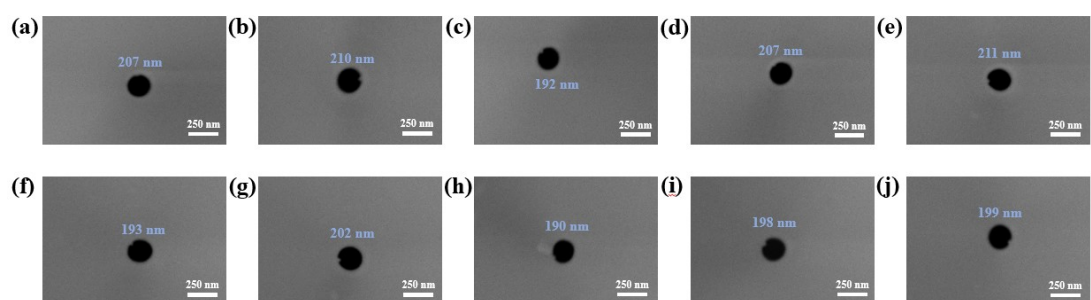

Figure S5 (a-j) SEM cross-sectional images of ten nanopipette tips fabricated under the same parameter set (Heat 252, Filament 3, Velocity 35, Delay 235, Pull 135).

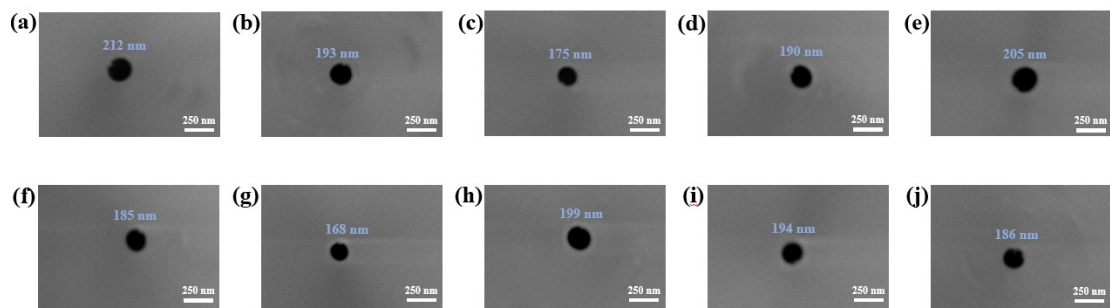

Figure S6 (a-j) SEM cross-sectional images of ten nanopipette tips fabricated under the same parameter set (Heat 255, Filament 3, Velocity 35, Delay 235, Pull 135).

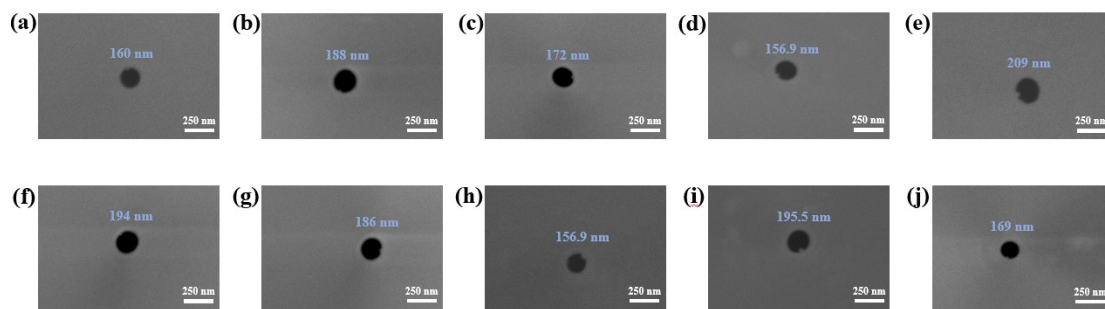

Figure S7 (a-j) SEM cross-sectional images of ten nanopipette tips fabricated under the same parameter set (Heat 252, Filament 3, Velocity 35, Delay 235, Pull 137).

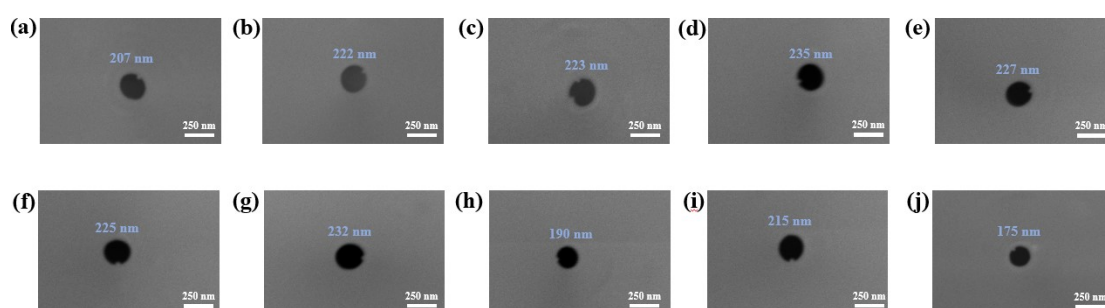

Figure S8 (a-j) SEM cross-sectional images of ten nanopipette tips fabricated under the same parameter set (Heat 252, Filament 3, Velocity 35, Delay 235, Pull 133).

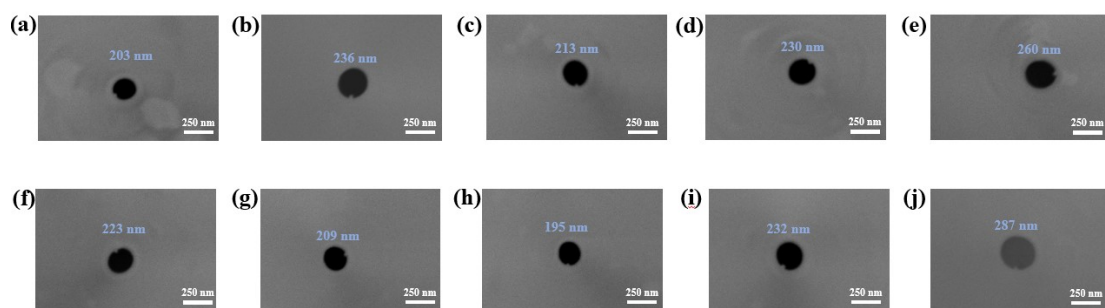

Figure S9 (a-j) SEM cross-sectional images of ten nanopipette tips fabricated under the same parameter set (Heat 252, Filament 3, Velocity 35, Delay 237, Pull 135).

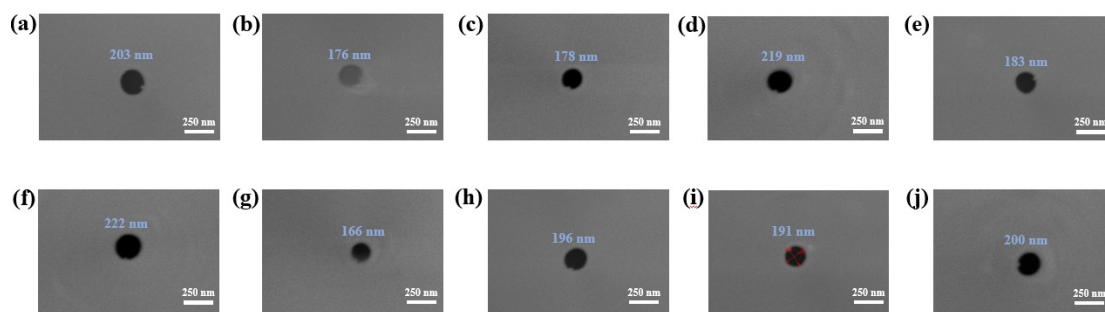

Figure S10 (a-j) SEM cross-sectional images of ten nanopipette tips fabricated under the same parameter set (Heat 252, Filament 3, Velocity 35, Delay 233, Pull 135).

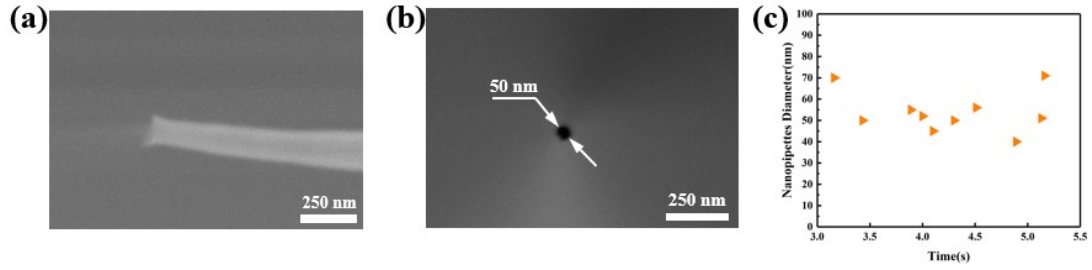

Figure S11 SEM characterization of a 50 nm nanopipette fabricated with parameters Heat 320, Filament 4, Velocity 35, Delay 235, Pull 150. (a) Top-down view. (b) Cross-sectional view. (c) Diameter measurements from ten independent fabrication runs.

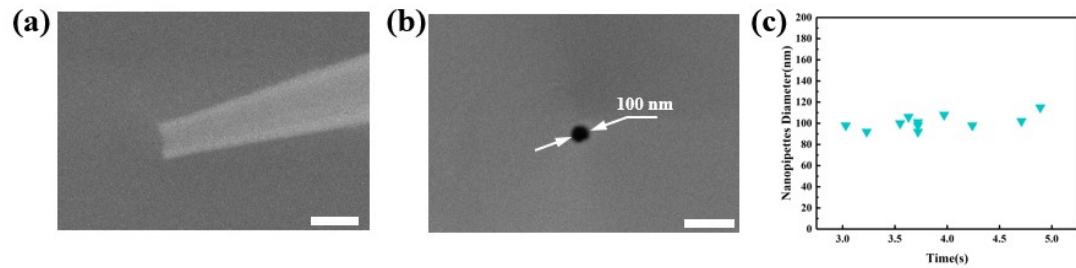

Figure S12 SEM characterization of a 100 nm nanopipette fabricated with parameters Heat 300, Filament 4, Velocity 35, Delay 235, Pull 145. (a) Top-down view. (b) Cross-sectional view. (c) Diameter measurements from ten independent fabrication runs.

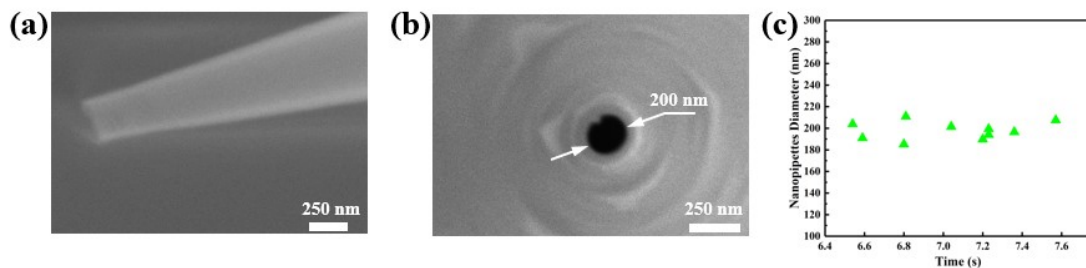

Figure S13 SEM characterization of a 200 nm nanopipette fabricated with parameters Heat 252, Filament 3, Velocity 35, Delay 235, Pull 135. (a) Top-down view. (b) Cross-sectional view. (c) Diameter measurements from ten independent fabrication runs.

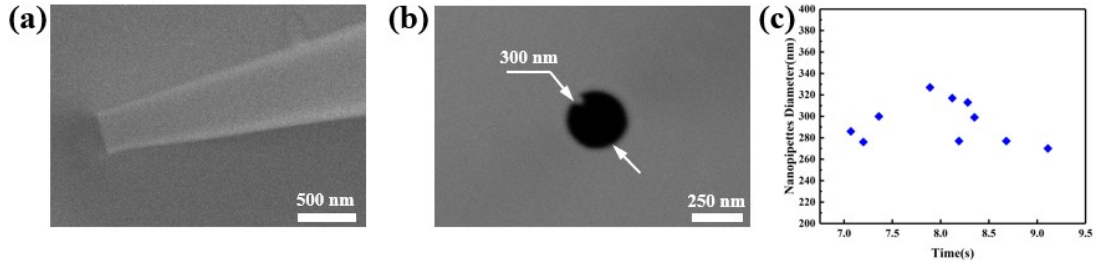

Figure S14 SEM characterization of a 300 nm nanopipette fabricated with parameters Heat 240 Filament 2, Velocity 35, Delay 240, Pull 135. (a) Top-down view. (b) Cross-sectional view. (c) Diameter measurements from ten independent fabrication runs.

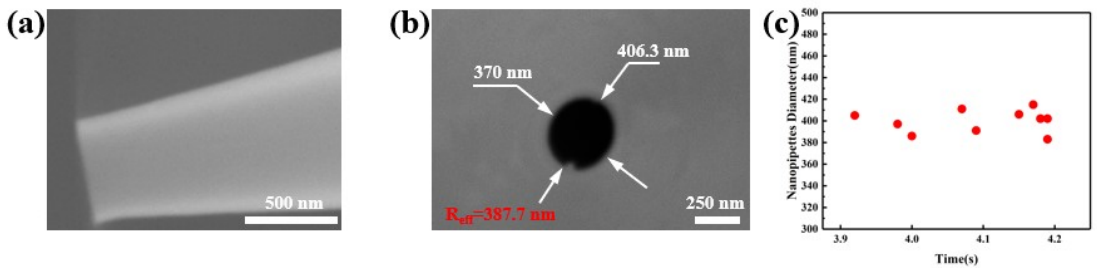

Figure S15 SEM characterization of a 400 nm nanopipette fabricated using a two-line program: Heat 300, Filament 3, Velocity 40, Delay 255, Pull 0 /Heat 300, Filament 3, Velocity 70, Delay 128, Pull 35. (a) Top-down view. (b) Cross-sectional view.

Equivalent circular radius is calculated as  $R_{eff} = \sqrt{a \times b}$ . (c) Diameter distribution from ten independent fabrication runs.

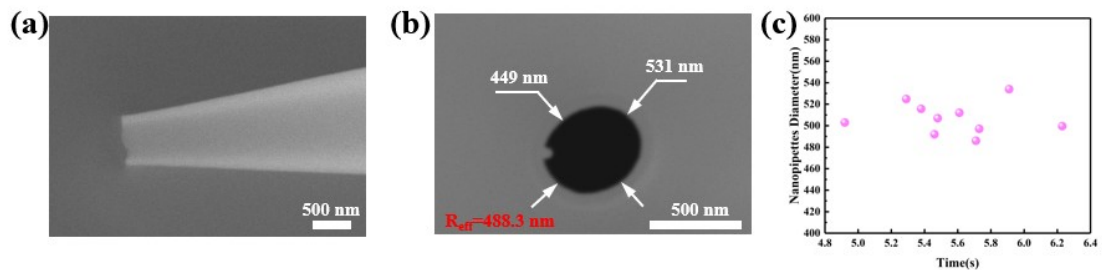

Figure S16 SEM characterization of a 500 nm nanopipette fabricated using a two-line program: Heat 270, Filament 3, Velocity 40, Delay 255, Pull 0 /Heat 270, Filament 3, Velocity 70, Delay 128, Pull 35. (a) Top-down view. (b) Cross-sectional view.

Equivalent circular radius is calculated as  $R_{eff} = \sqrt{a \times b}$ . (c) Diameter distribution

from ten independent fabrication runs.

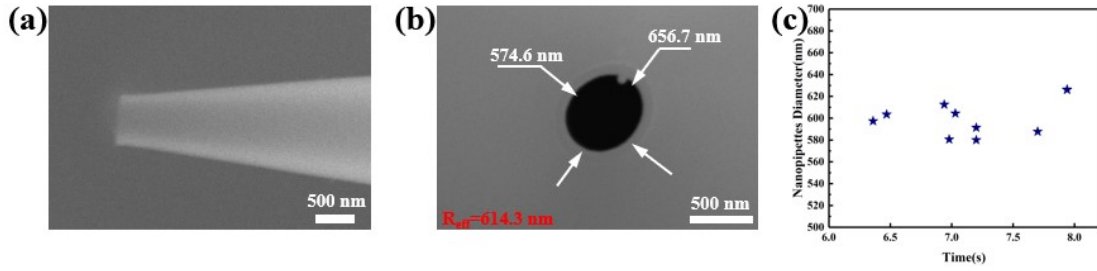

Figure S17 SEM characterization of a 600 nm nanopipette fabricated using a two-line program: Heat 260, Filament 3, Velocity 40, Delay 255, Pull 0 /Heat 260, Filament 3, Velocity 70, Delay 128, Pull 35. (a) Top-down view. (b) Cross-sectional view.

Equivalent circular radius is calculated as  $R_{eff} = \sqrt{a \times b}$ . (c) Diameter distribution from ten independent fabrication runs.

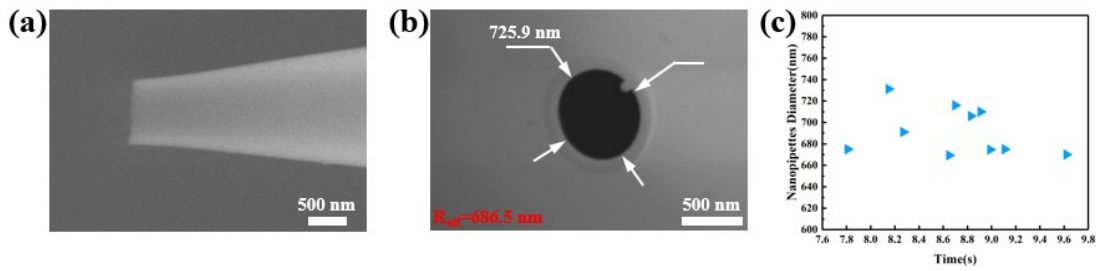

Figure S18 SEM characterization of a 700 nm nanopipette fabricated using a two-line program: Heat 245, Filament 3, Velocity 40, Delay 255, Pull 0 /Heat 245, Filament 3, Velocity 70, Delay 128, Pull 35. (a) Top-down view. (b) Cross-sectional view.

Equivalent circular radius is calculated as  $R_{eff} = \sqrt{a \times b}$ . (c) Diameter distribution from ten independent fabrication runs.

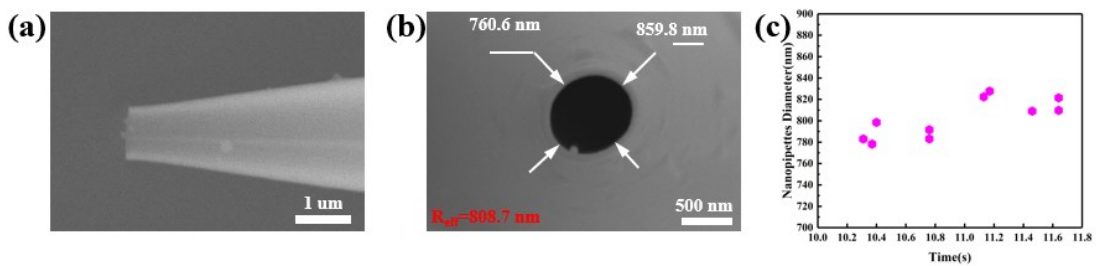

Figure S19 SEM characterization of a 800 nm nanopipette fabricated using a two-line program: Heat 240, Filament 3, Velocity 40, Delay 255, Pull 0 /Heat 240, Filament 3,

Velocity 70, Delay 128, Pull 35. (a) Top-down view. (b) Cross-sectional view. Equivalent circular radius is calculated as  $R_{eff} = \sqrt{a \times b}$ . (c) Diameter distribution from ten independent fabrication runs.

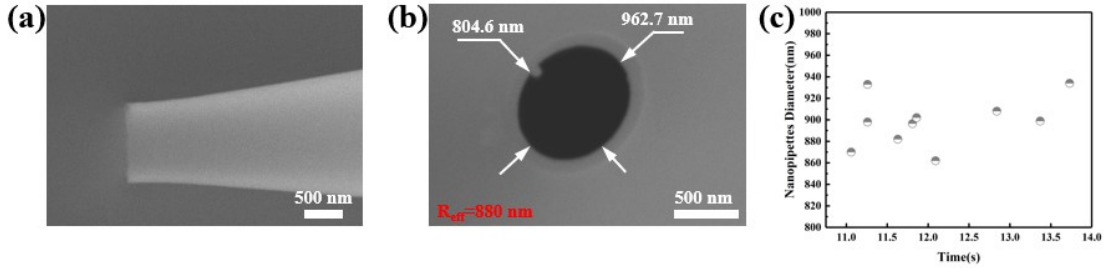

Figure S20 SEM characterization of a 900 nm nanopipette fabricated using a two-line program: Heat 230, Filament 3, Velocity 40, Delay 255, Pull 0 /Heat 230, Filament 3, Velocity 70, Delay 128, Pull 35. (a) Top-down view. (b) Cross-sectional view.

Equivalent circular radius is calculated as  $R_{eff} = \sqrt{a \times b}$ . (c) Diameter distribution from ten independent fabrication runs.

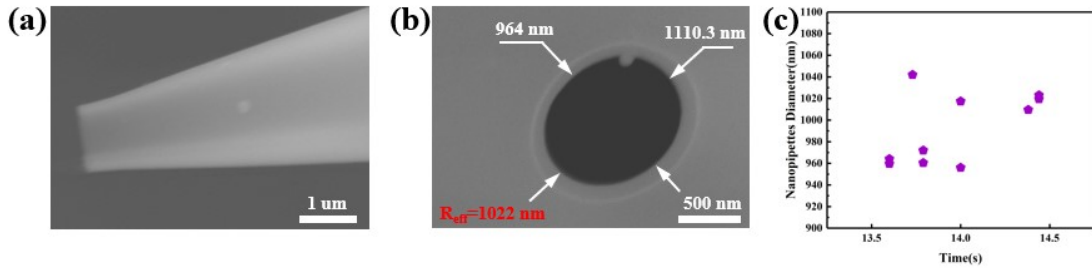

Figure S21 SEM characterization of a 1000 nm nanopipette fabricated using a two-line program: Heat 227, Filament 3, Velocity 40, Delay 255, Pull 0 /Heat 227, Filament 3, Velocity 70, Delay 128, Pull 35. (a) Top-down view. (b) Cross-sectional view. Equivalent circular radius is calculated as  $R_{eff} = \sqrt{a \times b}$ . (c) Diameter distribution from ten independent fabrication runs.

Table S2 Pulling parameters for 50 nm-1000 nm nanopipettes

|    |      |          |          |       |      | Nanopipettes |
|----|------|----------|----------|-------|------|--------------|
|    | Heat | Filament | Velocity | Delay | Pull | Diameter(nm) |
| 1  | 320  | 4        | 35       | 235   | 150  | 50           |
| 2  | 300  | 4        | 35       | 235   | 145  | 100          |
| 3  | 252  | 3        | 35       | 235   | 135  | 200          |
| 4  | 240  | 2        | 35       | 240   | 135  | 300          |
| 5  | 300  | 3        | 40       | 255   |      |              |
|    | 300  | 3        | 70       | 128   | 35   | 400          |
| 6  | 270  | 3        | 40       | 255   |      |              |
|    | 270  | 3        | 70       | 128   | 35   | 500          |
| 7  | 255  | 3        | 40       | 255   |      |              |
|    | 255  | 3        | 70       | 128   | 35   | 600          |
| 8  | 245  | 3        | 40       | 255   |      |              |
|    | 245  | 3        | 70       | 128   | 35   | 700          |
| 9  | 240  | 3        | 40       | 255   |      |              |
|    | 240  | 3        | 70       | 128   | 35   | 800          |
| 10 | 230  | 3        | 40       | 255   |      |              |
|    | 230  | 3        | 70       | 128   | 35   | 900          |
| 11 | 227  | 3        | 40       | 255   |      |              |
|    | 227  | 3        | 70       | 128   | 35   | 1000         |
|    | 240  | 3        | 70       | 128   | 35   | 800          |
| 10 | 230  | 3        | 40       | 255   |      |              |
|    | 230  | 3        | 70       | 128   | 35   | 900          |
| 11 | 227  | 3        | 40       | 255   |      |              |
|    | 227  | 3        | 70       | 128   | 35   | 1000         |
